# Supplementary material
Source: publisher site journal article supplement (https://en-cdn.bio-protocol.org/attached/file/20181007/3059%20Supplemental%20file%20Data%20analysis.docx)
Supplement: Supplementary file 1 [file 3059%20Supplemental%20file%20Data%20analysis.docx]

###########################Plant pneumatic calculator###########################

# Script to process plant hydraulic vulnerability curves estimated from pneumatic method

# 1 - Process data

# 2 - Fit sigmoidal equation do data and get parameters

# 3 - Plot data

################################################################################

###########################1 - Process data#####################################

### Load data

# Data must have the following columns and headers:

# "species"

# "individual"

# "replicate"

# "sensor.offset" - sensor response at atmospheric pressure (V)

# "reservoir.volume" - air reservoir volume used as a reference for air discharge measurements (mL)

# "psi" - xylem water potential (MPa)

# "p.ini" - pressure in the beggining of measurement (V)

# "p.end" - pressure in the end of measurement (V)

data = read.table(file = "data.example.csv", sep= ",", header = T, stringsAsFactors = F)

### Input parameters

p.atm = 98 # atmospheric pressure where measurement was carried

sensor.parameter = (1/0.333)*6.895 # multiplier to change from volts to PSI (1/0.333, for 142PC05D, according to datasheet), and from PSI to kPa (6.895)

t.air = 293.15 # air temperature (K)

### Transforms from V to kPa

data$p.ini = p.atm - (data$p.ini - data$sensor.offset) * sensor.parameter

data$p.end = p.atm - (data$p.end - data$sensor.offset) * sensor.parameter

### Calculates how many mmols of air were discharged from the branch. We calculate the difference between the number of mols in the initial pressure and in the final pressure using the ideal gas law. Room temperature was around 293.15K during all the experiment.

# data$reservoir.volume*10^-6 is reservoir volume in m-3

# data$p.end*1000 and data$p.ini*1000 are initial and final pressures in Pa

# 8.3144621 is the gas constant (J s-2 mol-2)

# t.air is mean laboratory temperature (K)

# data$discharged.air is in mol

data$air.ini = (((data$p.ini*1000) * (data$reservoir.volume*10^-6)) / (8.3144621*t.air))

data$air.end = (((data$p.end*1000) * (data$reservoir.volume*10^-6)) / (8.3144621*t.air))

### Calculate air discharged between those two intervals

data$ad = data$air.end - data$air.ini

### Transform air discharged to microliters

data$ad = (data$ad*8.3144621*t.air/p.atm*1000)*1000*1000*1000

### Calculate PAD

# PAD is calculated standardizing by air discharge by the most hydrated measurement and the most dehydrated measurement:

# 100*(ad - ad[maximum psi])/(ad[maximum psi] - ad[minimum psi]))

# PAD is calculated for each replicate of each individual

data$pad=NA

for(row in 1:nrow(data)){ #standardize by min and max

species = data$species[row]; individual = data$individual[row]; replicate = data$replicate[row] # get species, individual and replicate

work.table = data[data$species == species & data$individual == individual & data$replicate == replicate,] # subset data by species, individual and replicate

ad.max = work.table$ad[work.table$psi == min(work.table$psi)] # get air discharge at lowest xylem water potential

ad.min = work.table$ad[work.table$psi == max(work.table$psi)] # get air discharge at highest xylem water potential

data$pad[row] = 100*((data$ad[row] - ad.min) / (ad.max - ad.min))

}

################################################################################

###########2 - Fit sigmoidal equation do data and get parameters################

### Fit PAD curves and estimate parameters

# Outputs table "pad.results" with following columns:

# "species"

# "slope" - slope of sigmoidal equation (%PAD / MPa)

# "p50" - xylem water potential leading to 50% PAD values

# "p88" - xylem water potential leading to 88% PAD values

# "p50.se" - standard error or "p50" parameter

# "slope.se" - standard error of "slope" parameter

### Function for testing different start values in the nls (non-linear regression) function

# If the start values were not good, new start values are input to nls() randomly sampled from a plausible range of values

try.nls <- function(work.table,model,start){#try nls with different start parameters, returns fit=null if no fit is achieved

for(i in 1:100){ #try 100 different start values

a1=sample(seq(start[1],start[2],abs(start[1]-start[2])/10),1) #sample start value from boundaries set by "start" for one parameter

a2=sample(seq(start[3],start[4],abs(start[3]-start[4])/10),1) #sample start value from boundaries set by "start" for one parameter

start.value = list(a=a1,b=a2) #creates a list with start values

fit<-NULL

try(fit<-nls(model,data=work.table,start=start.value), silent = T) #fit the model to data, returns null if a fit was not found

if(!is.null(fit))break #ends the loop if a fit was found

}

if(!is.null(fit)) return(fit) #if there was a fit, returns it

else return(fit=NULL) # if there was not a fit, returns NULL

}

### Calculates PAD curves parameters, store results in "pad.results"

# PAD curves are calculated pooling together all data for each species

pad.results=data.frame(species = unique(data$species), slope=NA, p50=NA, p88=NA, p50.se = NA, slope.se = NA) # creates a dataframe with species name

row=1 # which row to write in the "results" table

for(row in 1:nrow(pad.results)){# loop to calculate for each species

# subset data

species = pad.results$species[row]

work.table=data[data$species==species,] # subsets data by species

# model and start values

model = pad~100/(1+exp((a/25)*(psi-b))) #input model (sigmoidal equation)

start = c(0,4,-6,-0.5)#start values

fit = try.nls(work.table,model,start)# calculates the parameters of the non-linear regression

if(!is.null(fit)){# test if a non-linear fit was found, else skip the extraction of parameters from the model

regression = summary(fit) # summary of fit

slope = regression$coefficients[1] # slope parameter

p50 = regression$coefficients[2] # psi where PAD = 50%

p88 = log(12/88,exp(1))/(slope/25) + p50 # psi where PAD = 88%; calculated inverting the sigmoidal equation PAD = f(psi) to psi = f(PAD) with the fit parameters

slope.se = regression$coefficients[1,2] # slope parameter standard error

p50.se = regression$coefficients[2,2] # standard error of psi where PAD = 50%

pad.results$slope[row] = slope # store data

pad.results$p50[row] = p50 # store data

pad.results$p88[row] = p88 # store data

pad.results$p50.se[row] = p50.se # store data

pad.results$slope.se[row] = slope.se # store data

}

row=row+1 #switch to next row of the results table in the next run of the loop

}

write.table(pad.results, "pad.results.csv", sep = ",", row.names = F) # save data to a .csv file in R`s current working directory

################################################################################

###########3 - Plot data################

# Graphs are stored in R is current working directory

### Plot PAD as a function of xylem water potential

# Each individual is plotted using a different color

# Each replicate is plotted using a different symbol with the same color of the individual

dir = paste(getwd(),sep="") # dir path

for(species in unique(data$species)){ # loop for each species

work.table1 = data[data$species == species,] # subset data by species

col = rainbow(length(unique(work.table1))) # get as many colors as there are individuals for each species

col.n=1 # used to change plot color

file=paste(dir,"/pad-",species,"-.png",sep="") # plot filename

png(file) # open device

xlim = range(work.table$psi,na.rm = T) # x-axis limit

ylim = range(work.table$pad,na.rm = T) # y-axis limit

par(mfrow=c(1,1),mar=c(6,6,1,1),oma=c(0,0,0,0),bty="l") # graphical parameters

for(individual in unique(work.table1$individual)){ # loop for each individual

work.table2 = work.table1[work.table1$individual == individual,] # subset data again by individual

pch = 1 # reference to plot with different symbols

for(replicate in unique(work.table2$replicate)){ # loop for replicates

work.table3 = work.table2[work.table2$replicate == replicate,] # subset again by replicate

plot(pad ~ psi,data = work.table3, # plot replicate data

cex=2,cex.axis=2,cex.lab=2,lwd=2,xlim=xlim,ylim=ylim, # graphical parameters

col=col[col.n], pch = pch, # color of individual and symbol of replicate

xlab = "Xylem water potential (MPA)", ylab = "PAD (%)") # axis labels

pch = pch + 1 # increment symbol reference

par(new=T) # continue with same plot device

}

col.n=col.n+1 # increment color reference

pch = 1 # reset symbol reference

}

# plot curve, p50 and p88 of species

slope = pad.results$slope[pad.results$species==species] # get slope

p50 = pad.results$p50[pad.results$species==species] # get p50

p88 = pad.results$p88[pad.results$species==species] # get p88

curve(100/(1+exp((slope/25)*(x-p50))) , -10, 0, ylim=ylim , xlim=xlim, col="black", lwd=3, add=T) # plot sigmoidal curve

points(p50,50, lwd=3, cex=2.5) # plot p50

points(p88,88, lwd=3, cex=2.5) # plot p88

dev.off() # end device

col.n =1 # reset color reference

}

### Plot air discharge as a function of xylem water potential

# Each individual is plotted using a different color

# Each replicate is plotted using a different symbol with the same color of the individual

dir = paste(getwd(),sep="") # dir path

for(species in unique(data$species)){ # loop for each species

work.table1 = data[data$species == species,] # subset data by species

col = rainbow(length(unique(work.table1))) # get as many colors as there are individuals for each species

col.n=1 # used to change plot color

file=paste(dir,"/ad-",species,"-.png",sep="") # plot filename

png(file) # open device

xlim = range(work.table$psi, na.rm = T) # x-axis limit

ylim = range(work.table$ad,na.rm = T) # y-axis limit

par(mfrow=c(1,1),mar=c(6,6,1,1),oma=c(0,0,0,0),bty="l") # graphical parameters

for(individual in unique(work.table1$individual)){ # loop for each individual

work.table2 = work.table1[work.table1$individual == individual,] # subset data again by individual

pch = 1 # reference to plot with different symbols

for(replicate in unique(work.table2$replicate)){ # loop for replicates

work.table3 = work.table2[work.table2$replicate == replicate,] # subset again by replicate

plot(ad ~ psi,data = work.table3, # plot replicate data

cex=2,cex.axis=2,cex.lab=2,lwd=2,xlim=xlim,ylim=ylim, # graphical parameters

col=col[col.n], pch = pch, # color of individual and symbol of replicate

xlab = "Xylem water potential (MPA)", ylab = expression("Air discharged ("*mu*L*")")) # axis labels

pch = pch + 1 # increment symbol reference

par(new=T) # continue with same plot device

}

col.n=col.n+1 # increment color reference

pch = 1 # reset symbol reference

}

col.n =1 # reset color reference

dev.off() # end device

}

###

# Plant pneumatic calculator v3

# Paulo Bittencourt
